# Supplementary material for: A conserved ankyrin repeat-containing protein regulates conoid stability, motility and cell invasion in Toxoplasma gondii
Source: PubMed Central journal article supplement (PMC5740107; doi:10.1038/s41467-017-02341-2), 2017-12-21
Supplement: 41467_2017_2341_MOESM3_ESM.pdf [file 41467_2017_2341_MOESM3_ESM.pdf]

## **Description of Additional Supplementary Files**

File Name: Supplementary Data 1

Description: Input file for SFINX analysis

File Name: Supplementary Data 2

Description: Filtered output of the interactome analyses with additional information

File Name: Supplementary Data 3

Description: Filtered output of the protein interactome analyses with datasets from CPH-1BirA or MyoH-BirA

File Name: Supplementary Data 4

Description: Gene Ontology (GO) terms of molecular function for annotated proteins identified in the CPH1-RNG2-MyoH interactome

File Name: Supplementary Data 5

Description: GO terms of Cellular Compartment and Molecular Function for annotated proteins
